# Supplementary material for: Perceptions and Factors Influencing Eating Behaviours and Physical Function in Community-Dwelling Ethnically Diverse Older Adults: A Longitudinal Qualitative Study
Source: MDPI journal article supplement (doi:10.3390/nu11061224), 2019-05-29
Supplement: s1 [file s1]

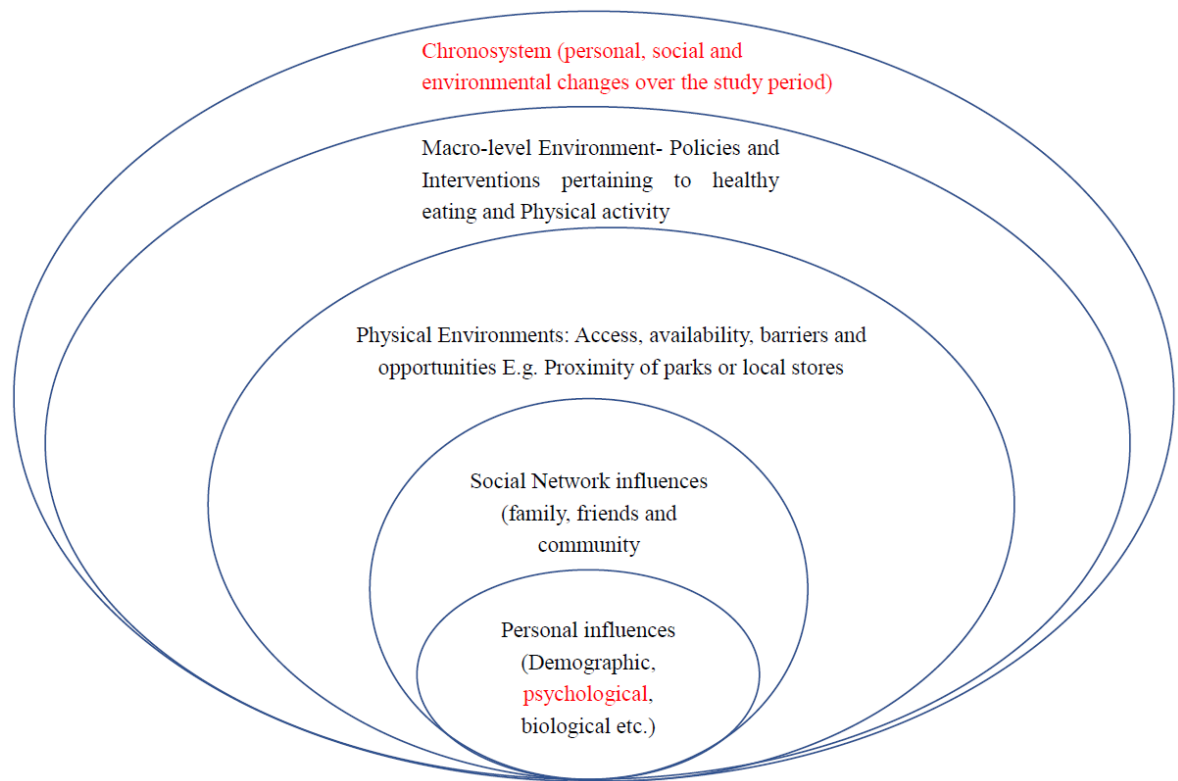

**Figure S1.** Adapted Ecological model depicting the influences of eating behaviours in community-dwelling ethnically diverse older adults.

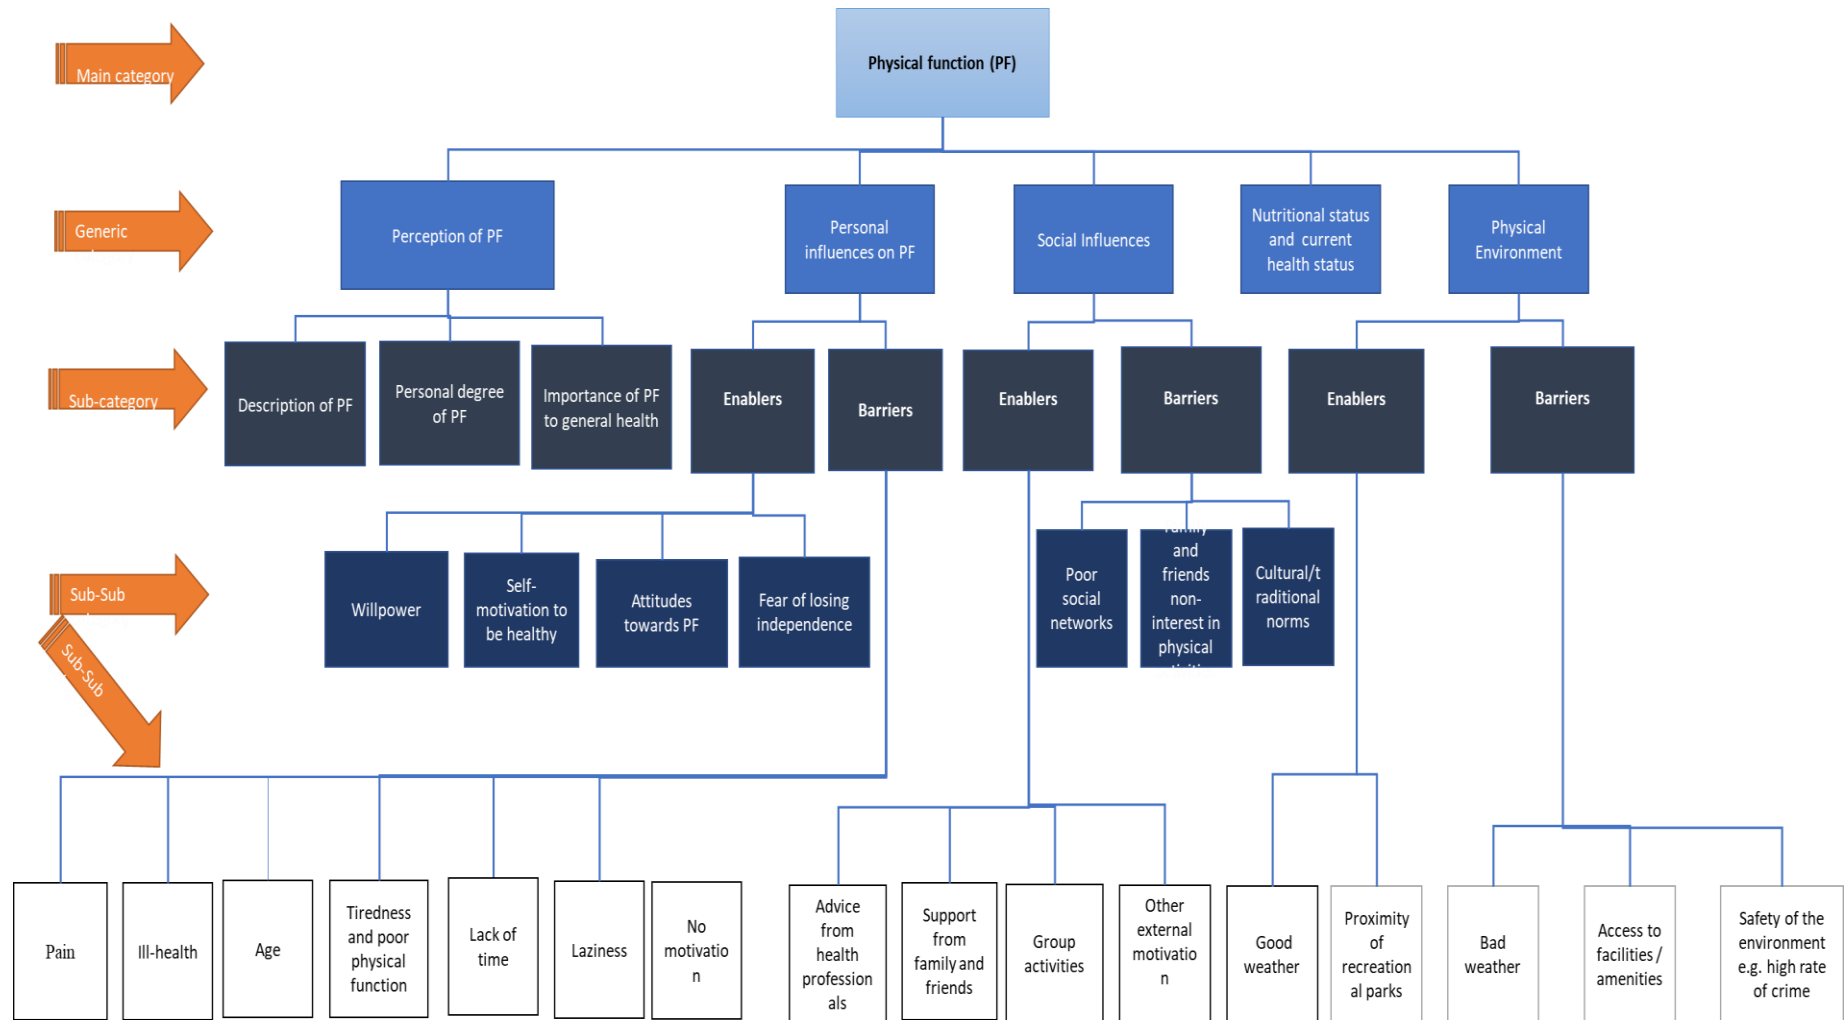

**Figure S2:** Complete coding matrix: Factors influencing physical function
